# Supplementary material
Source: publisher site journal article supplement (https://www.dovepress.com/article/573082)
Supplement: Supplementary file 1 [file 573082_supplementary_tableS1-4.docx]

**Supplementary Table S1.** Information of 150 strains of clinical *Enterococcus* analyzed in this study.

| **Acquisition time** | **Sample number** | **Specimen type** | **Source department** | **Species** | **Benzylpenicillin** | **Ampicillin** | **Levofloxacin** | **Linezolid** | **Tigecycline** | **Vancomycin** | Teicoplanin | **Erythromycin** | **Gentamicin** |
| --- | --- | --- | --- | --- | --- | --- | --- | --- | --- | --- | --- | --- | --- |
| 2024/7/2 | S9397 | Ascites | Surgery | *E. faecium* | 0.25  (S) | <=2.00 (S) | 2.00  (S) | 2.00 (S) | <=0.12 (S) | <=0.50 (S) | <=0.50 (S) | >=8.00  (R) | SYN-S (S) |
| 2023/11/1 | S8813 | Blood | ICU | *E. faecium* | >=64.00 (R) | >=32.00  (R) | >=8.00 (R) | 2.00 (S) | <=0.12 (S) | <=4.00 (S) | <=8.00 (S) | >=8.00 (R) | SYN-S (S) |
| 2023/7/4 | S8730 | Urine | Internal medicine | *E. faecium* | >=64.00 (R) | >=32.00 (R) | >=8.00 (R) | 2.00 (S) | <=0.12 (S) | 1.00  (S) | <=0.50 (S) | >=8.00 (R) | SYN-S (S) |
| 2023/6/26 | S8294 | Urine | ICU | *E. faecium* | >=64.00 (R) | >=32.00 (R) | >=8.00 (R) | 1.00 (S) | <=0.12 (S) | <=0.50 (S) | <=0.50 (S) | >=8.00 (R) | SYN-R (R) |
| 2023/6/25 | S8251 | Urine | Surgery | *E. faecium* | >=64.00 (R) | >=32.00 (R) | >=8.00 (R) | 2.00 (S) | <=0.12 (S) | <=4.00 (S) | <=8.00 (S) | >=8.00 (R) | SYN-S (S) |
| 2023/6/11 | S7637 | Bile | Surgery | *E. faecium* | >=64.00 (R) | >=32.00 (R) | >=8.00 (R) | 2.00 (S) | <=0.12 (S) | <=0.5 (S) | <=0.50 (S) | >=8.00 (R) | SYN-S (S) |
| 2023/6/11 | S7603 | Urine | Surgery | *E. faecium* | >=64.00 (R) | >=32.00 (R) | >=8.00 (R) | 2.00 (S) | <=0.12 (S) | <=0.5 (S) | <=0.50 (S) | >=8.00 (R) | SYN-R (R) |
| 2024/5/23 | S7392 | Urine | Surgery | *E. faecium* | >=64.00 (R) | >=32.00 (R) | >=8.00 (R) | 2.00 (S) | <=0.12 (S) | <=0.5 (S) | <=0.50 (S) | >=8.00  (R) | SYN-S (S) |
| 2024/9/6 | S7367 | Blood | ICU | *E. faecium* | >=64.00 (R) | >=32.00 (R) | >=8.00 (R) | 2.00 (S) | <=0.12 (S) | <=0.5 (S) | <=0.50 (S) | <=0.25 (S) | SYN-R (R) |
| 2023/5/30 | S7054 | Bile | Surgery | *E. faecium* | >=64.00 (R) | >=32.00 (R) | >=8.00 (R) | 2.00 (S) | <=0.12 (S) | 1.00  (S) | <=0.50 (S) | >=8.00 (R) | SYN-S (S) |
| 2023/5/30 | S7033 | Excreta | Surgery | *E. faecium* | >=64.00 (R) | >=32.00 (R) | >=8.00 (R) | 2.00 (S) | <=0.12 (S) | 1.00  (S) | <=0.5 (S) | >=8.00 (R) | SYN-S (S) |
| 2023/5/28 | S6995 | Excreta | Orthopedics | *E. faecium* | >=64.00 (R) | >=32.00 (R) | >=8.00 (R) | 2.00 (S) | <=0.12 (S) | 1.00  (S) | <=0.5 (S) | >=8.00 (R) | SYN-S (S) |
| 2024/5/14 | S6904 | Urine | Geriatrics | *E. faecium* | >=64.00 (R) | >=32.00 (R) | >=8.00 (R) | 2.00 (S) | <=0.12 (S) | <=0.5 (S) | <=0.5 (S) | >=8.00  (R) | SYN-S (S) |
| 2024/12/2 | S6678 | Pus | Surgery | *E. faecium* | >=64.00 (R) | >=32.00 (R) | >=8.00 (R) | 2.00 (S) | <=0.12 (S) | <=0.5 (S) | <=0.5 (S) | <=0.25 (S) | SYN-R (R) |
| 2024/12/4 | S6644 | Ascites | Surgery | *E. faecium* | >=64.00 (R) | >=32.00 (R) | >=8.00 (R) | 2.00 (S) | <=0.12 (S) | 1.00  (S) | <=0.5 (S) | >=8.00  (R) | SYN-R (R) |
| 2024/12/2 | S6638 | Urine | Surgery | *E. faecium* | >=64.00 (R) | >=32.00 (R) | >=8.00 (R) | 2.00 (S) | <=0.12 (S) | <=0.5 (S) | <=0.5 (S) | >=8.00  (R) | SYN-S (S) |
| 2023/5/22 | S6605 | Urine | Surgery | *E. faecium* | >=64.00 (R) | >=32.00 (R) | >=8.00 (R) | 2.00 (S) | <=0.12 (S) | <=4.00  (S) | 8.00  (R) | >=8.00 (R) | \ |
| 2023/5/21 | S6585 | Urine | Geriatrics | *E. faecium* | >=64.00 (R) | >=32.00 (R) | >=8.00 (R) | 2.00 (S) | <=0.12 (S) | 1.00  (S) | <=0.5 (S) | >=8.00 (R) | SYN-S (S) |
| 2023/5/21 | S6573 | Urine | Surgery | *E. faecium* | >=64.00 (R) | >=32.00 (R) | >=8.00 (R) | 2.00 (S) | <=0.12 (S) | \ | \ | >=8.00 (R) | SYN-S (S) |
| 2023/2/17 | S6449 | Blood | Surgery | *E. faecium* | >=64.00 (R) | >=32.00 (R) | >=8.00 (R) | 1.00 (S) | <=0.12 (S) | <=0.50 (S) | <=0.50 (S) | >=8.00 (R) | SYN-S (S) |
| 2024/11/22 | S6203 | Excreta | Orthopedics | *E. faecium* | >=64.00 (R) | >=32.00 (R) | >=8.00 (R) | 2.00 (S) | <=0.12 (S) | <=0.50 (S) | <=0.50 (S) | >=8.00  (R) | SYN-S (S) |
| 2023/5/7 | S5857 | Urine | Internal medicine | *E. faecium* | 2.00  (S) | <=2.00 (S) | 2.00  (S) | 2.00 (S) | <=0.12 (S) | <=0.50 (S) | 1.00  (S) | <=0.25 (S) | SYN-S (S) |
| 2023/2/17 | S5717 | Urine | Internal medicine | *E. faecium* | >=64.00 (R) | >=32.00 (R) | >=8.00 (R) | 2.00 (S) | <=0.12 (S) | <=0.50 (S) | <=0.50 (S) | >=8.00 (R) | SYN-S (S) |
| 2023/5/2 | S5617 | Bile | Surgery | *E. faecium* | >=64.00 (R) | >=32.00 (R) | >=8.00 (R) | 2.00 (S) | <=0.12 (S) | 1.00  (S) | 1.00  (S) | >=8.00 (R) | SYN-S (S) |
| 2023/11/20 | S5463 | Urine | Internal medicine | *E. faecium* | >=64.00 (R) | \ | >=8.00 (R) | 4.00  (I) | <=0.12 (S) | 0.50  (S) | 0.50  (S) | >=8.00 (R) | 512.00  (S) |
| 2024/4/16 | S5402 | Pus | Geriatrics | *E. faecium* | >=64.00 (R) | >=32.00 (R) | >=8.00 (R) | 2.00 (S) | <=0.12 (S) | <=0.50 (S) | <=0.50 (S) | >=8.00 (R) | SYN-R (R) |
| 2023/4/24 | S5290 | Bile | Internal medicine | *E. faecium* | >=64.00 (R) | >=32.00 (R) | >=8.00 (R) | 1.00 (S) | <=0.12 (S) | <=0.50 (S) | <=0.50 (S) | >=8.00 (R) | SYN-S (S) |
| 2023/11/15 | S5219 | Urine | Surgery | *E. faecium* | >=64.00 (R) | >=32.00 (R) | >=8.00 (R) | 2.00 (S) | <=0.12 (S) | <=0.50 (S) | <=0.50 (S) | >=8.00 (R) | SYN-R (R) |
| 2023/11/11 | S5022 | Urine | EICU | *E. faecium* | 32.00  (R) | >=32.00 (R) | >=8.00 (R) | 2.00 (S) | <=0.12 (S) | <=0.50 (S) | <=0.50 (S) | >=8.00 (R) | SYN-R (R) |
| 2024/6/13 | S4991 | Blood | Surgery | *E. faecium* | >=64.00 (R) | >=32.00 (R) | >=8.00 (R) | 2.00 (S) | <=0.12 (S) | <=0.50 (S) | <=0.50 (S) | >=8.00  (R) | SYN-S (S) |
| 2023/4/16 | S4867 | Puncture fluid | Surgery | *E. faecium* | >=64.00 (R) | >=32.00 (R) | >=8.00 (R) | 2.00 (S) | <=0.12 (S) | <=0.50 (S) | 2.00  (S) | >=8.00 (R) | SYN-R (R) |
| 2024/6/6 | S4788 | Blood | ICU | *E. faecium* | >=64.00 (R) | >=32.00 (R) | >=8.00 (R) | 2.00 (S) | <=0.12 (S) | <=0.50 (S) | <=0.50 (S) | >=8.00  (R) | SYN-S (S) |
| 2023/4/14 | S4734 | Urine | Surgery | *E. faecium* | >=64.00 (R) | >=32.00 (R) | >=8.00 (R) | 2.00 (S) | <=0.12 (S) | <=4.00  (S) | 8.00  (S) | 8.00  (S) | SYN-S (S) |
| 2023/4/8 | S4475 | Bile | ICU | *E. faecium* | >=64.00 (R) | >=32.00 (R) | >=8.00 (R) | 2.00 (S) | <=0.12 (S) | <=0.50 (S) | <=0.50 (S) | >=8.00 (R) | SYN-S (S) |
| 2024/10/16 | S4232 | Ascites | ICU | *E. faecium* | >=64.00 (R) | >=32.00 (R) | >=8.00 (R) | 2.00 (S) | <=0.12 (S) | 1.00  (S) | <=0.50 (S) | >=8.00 (R) | 1000.00  (R) |
| 2024/5/16 | S4157 | Blood | Surgery | *E. faecium* | >=64.00 (R) | >=32.00 (R) | >=8.00 (R) | 2.00 (S) | <=0.12 (S) | <=0.50 (S) | <=0.50 (S) | <=0.25 (S) | 256.00  (S) |
| 2024/3/18 | S3875 | Bile | Internal medicine | *E. faecium* | >=64.00 (R) | >=32.00 (R) | >=8.00 (R) | 2.00 (S) | <=0.12 (S) | <=0.50 (S) | <=0.50 (S) | >=8.00  (R) | SYN-R (R) |
| 2024/4/24 | S3456 | Blood | Surgery | *E. faecium* | 64.00  (R) | 32.00  (R) | 8.00  (R) | 2.00 (S) | <=0.12 (S) | 0.50  (S) | \ | 0.25  (S) | SYN-S (S) |
| 2024/4/23 | S3419 | Blood | Internal medicine | *E. faecium* | >=64.00 (R) | >=32.00 (R) | >=8.00 (R) | 2.00 (S) | <=0.12 (S) | <=0.50 (S) | 8.00  (R) | >=8.00  (R) | SYN-S (S) |
| 2023/3/13 | S3218 | Urine | Surgery | *E. faecium* | >=64.00 (R) | >=32.00 (R) | >=8.00 (R) | 2.00 (S) | <=0.12 (S) | 1.00  (S) | <=0.50 (S) | >=8.00 (R) | SYN-S (S) |
| 2023/2/11 | S2970 | Blood | Surgery | *E. faecium* | >=64.00 (R) | >=32.00 (R) | >=8.00 (R) | 2.00 (S) | <=0.12 (S) | <=0.5 (S) | <=0.5 (S) | >=8.00 (R) | SYN-R (R) |
| 2024/2/29 | S2863 | Urine | ICU | *E. faecium* | 1.00  (S) | <=2.00 (S) | 2.00 (S) | 2.00 (S) | <=0.12 (S) | <=0.50 (S) | 1.00  (S) | >=8.00 (R) | SYN-S (S) |
| 2024/2/29 | S2834 | Urine | Surgery | *E. faecium* | >=64.00 (R) | >=32.00 (R) | >=8.00 (R) | 2.00 (S) | <=0.12 (S) | <=0.50 (S) | <=0.50 (S) | >=8.00 (R) | SYN-R (R) |
| 2023/9/20 | S2638 | Urine | Rehabilitation medicine | *E. faecium* | >=64.00 (R) | >=32.00 (R) | >=8.00 (R) | 2.00 (S) | 0.25 (S) | <=4.00 (S) | <=8.00 (S) | >=8.00 (R) | SYN-S (S) |
| 2024/2/22 | S2439 | Bile | Internal medicine | *E. faecium* | >=64.00 (R) | >=32.00 (R) | >=8.00 (R) | 2.00 (S) | <=0.12 (S) | <=0.50 (S) | <=0.50 (S) | >=8.00 (R) | SYN-R (R) |
| 2024/2/22 | S2430 | Bile | Surgery | *E. faecium* | 8.00  (S) | <=2.00 (S) | 2.00 (S) | 2.00 (S) | 0.25 (S) | <=0.50 (S) | <=0.50 (S) | 4.00  (I) | SYN-S (S) |
| 2024/2/18 | S2195 | Ascites | Surgery | *E. faecium* | >=64.00 (R) | >=32.00 (R) | >=8.00 (R) | 2.00 (S) | <=0.12 (S) | <=0.50 (S) | <=0.50 (S) | >=8.00 (R) | SYN-S (S) |
| 2023/9/6 | S1961 | Urine | ICU | *E. faecium* | >=64.00 (R) | >=32.00 (R) | >=8.00 (R) | 2.00 (S) | <=0.12 (S) | <=0.50 (S) | <=0.50 (S) | >=8.00 (R) | SYN-R (R) |
| 2023/9/2 | S1256 | Urine | ICU | *E. faecium* | \ | 6.00  (R) | 6.00  (R) | 24.00 (S) | \ | 20.00  (S) | \ | \ | 6.00  (R) |
| 2024/1/22 | S1118 | Urine | Pediatrics | *E. faecium* | >=64.00 (R) | >=32.00 (R) | >=8.00 (R) | 2.00 (S) | <=0.12 (S) | <=0.50 (S) | <=0.50 (S) | 4.00  (I) | SYN-S (S) |
| 2023/9/26 | S1015 | Bile | Surgery | *E. faecium* | \ | 6.00  (R) | \ | 24.00  (S) | \ | 20.00  (S) | \ | \ | 21.00  (S) |
| 2023/8/27 | S0992 | Urine | Surgery | *E. faecium* | \ | 6.00  (R) | 6.00  (R) | 28.00  (S) | \ | 19.00  (S) | \ | \ | 13.00  (S) |
| 2024/2/1 | S0779 | Alveolar lavage fluid | Surgery | *E. faecium* | >=64.00 (R) | >=32.00 (R) | >=8.00 (R) | 4.00 (S) | <=0.12 (S) | <=0.50 (S) | <=0.50 (S) | >=8.00 (R) | SYN-S (S) |
| 2024/1/12 | S0599 | Urine | ICU | *E. faecium* | >=64.00 (R) | >=32.00 (R) | >=8.00 (R) | 2.00 (S) | <=0.12 (S) | <=0.50 (S) | <=0.50 (S) | <=0.25 (S) | SYN-S (S) |
| 2024/11/12 | S0476 | Urine | Surgery | *E. faecium* | \ | ≥16.00  (R) | ≥8.00  (R) | ≤2.00  (S) | \ | 2.00  (S) | ≤1.00  (S) | \ | ≤500.00  (S) |
| 2024/1/10 | S0440 | Urine | Surgery | *E. faecium* | >=64.00 (R) | >=32.00 (R) | >=8.00 (R) | 2.00 (S) | <=0.12 (S) | <=0.50 (S) | <=0.50 (S) | >=8.00 (R) | SYN-R (R) |
| 2024/1/9 | S0439 | Urine | Internal medicine | *E. faecium* | >=64.00 (R) | >=32.00 (R) | >=8.00 (R) | 2.00 (S) | <=0.12 (S) | <=0.50 (S) | <=0.50 (S) | >=8.00 (R) | SYN-S (S) |
| 2024/11/9 | S0336 | Urine | Surgery | *E. faecium* | \ | ≥16.00 (R) | ≥8.00 (R) | ≤2.00 (S) | \ | 2.00  (S) | ≤1.00 (S) | \ | ≤500.00 (S) |
| 2024/7/20 | S0266 | Urine | Oncology | *E. faecium* | 32.00 (R) | >=32.00 (R) | >=8.00 (R) | 2.00 (S) | <=0.12 (S) | <=0.50 (S) | <=0.50 (S) | 4.00  (I) | SYN-S (S) |
| 2024/10/7 | S0181 | Urine | Surgery | *E. faecium* | \ | ≥16.00 (R) | ≥8.00 (R) | \ | \ | 1.00  (S) | ≤1.00  (S) | \ | ≤500.00 (S) |
| 2023/2/10 | S0101 | Urine | ICU | *E. faecium* | >=64.00 (R) | >=32.00 (R) | >=8.00 (R) | 2.00 (S) | <=0.12 (S) | <=0.50 (S) | <=0.50 (S) | >=8.00 (R) | SYN-S (S) |
| 2023/9/5 | S0066 | Urine | Surgery | *E. faecium* | \ | 6.00  (R) | 6.00  (R) | 28.00 (S) | \ | 20.00 (S) | \ | \ | 21.00  (S) |
| 2023/8/3 | S0040 | Excreta | Internal medicine | *E. faecium* | \ | 6.00  (R) | \ | 26.00 (S) | \ | 24.00 (S) | \ | \ | 22.00 (S) |
| 2023/12/18 | Q6940 | Excreta | Orthopedics | *E. casseliflavus* | 1.00  (S) | <=2.00 (S) | 2.00  (S) | 2.00 (S) | <=0.12 (S) | 4.00  (R) | <=0.50 (S) | 1.00  (I) | SYN-S (S) |
| 2024/5/5 | Q6406 | Bile | Internal medicine | *E. casseliflavus* | 0.50  (S) | <=2.00 (S) | 1.00 (S) | 2.00 (S) | <=0.12 (S) | 4.00  (R) | <=0.50 (S) | 2.00  (I) | SYN-S (S) |
| 2024/11/21 | Q6117 | Bile | Internal medicine | *E. casseliflavus* | 0.50  (S) | <=0.20 (S) | 2.00  (S) | 2.00 (S) | <=0.12 (S) | 2.00  (R) | <=0.50 (S) | 1.00  (I) | SYN-S500 |
| 2024/4/16 | Q5431 | Bile | Internal medicine | *E. casseliflavus* | 4.00  (S) | <=2.00 (S) | 2.00  (S) | 4.00  (I) | <=0.12 (S) | <=4.00 (S) | <=0.50 (S) | 1.00  (I) | SYN-S (S) |
| 2023/4/17 | Q4918 | Bile | Surgery | *E. casseliflavus* | 16.00 (R) | >=32.00 (R) | 1.00  (S) | 2.00 (S) | <=0.12 (S) | 4.00  (S) | 4.00  (S) | >=8.00 (R) | SYN-S (S) |
| 2023/11/3 | Q4638 | Excreta | Orthopedics | *E. casseliflavus* | <=0.12 (S) | <=2.00 (S) | 2.00  (S) | 2.00 (S) | <=0.12 (S) | 2.00  (R) | >=32.00 (R) | 2.00  (I) | SYN-S (S) |
| 2023/7/25 | N9839 | Bile | Surgery | *E. avium* | 0.25  (S) | <=2.00 (S) | 2.00 (S) | 2.00 (S) | <=0.12 (S) | <=0.50 (S) | <=0.50 (S) | 0.50  (S) | SYN-S (S) |
| 2023/6/9 | N7550 | Pus | Surgery | *E. avium* | \ | 26.00 (S) | 2.00  (S) | 31.00 (S) | \ | 22.00 (S) | \ | 26.00 (I) | \ |
| 2024/11/20 | N6104 | Excreta | Orthopedics | *E. avium* | 1.00  (S) | 8.00  (S) | 2.00  (S) | 2.00 (S) | <=0.12 (S) | <=0.50 (S) | \ | 0.50  (S) | SYN-S (S) |
| 2023/4/6 | N4394 | Pus | Surgery | *E. avium* | 0.50  (S) | <=2.00 (S) | 2.00  (S) | 1.00 (S) | <=0.12 (S) | <=0.50 (S) | <=0.50 (S) | >=8.00 (R) | SYN-R (R) |
| 2023/3/5 | N3144 | Excreta | Orthopedics | *E. avium* | 16.00 (R) | 8.00  (S) | 2.00  (S) | 2.00 (S) | <=0.13 (S) | <=0.50 (S) | 4.00  (S) | <=0.25 (S) | SYN-S (S) |
| 2024/2/20 | N1486 | Urine | Pediatrics | *E. avium* | 32.00 (R) | 8.00  (S) | 1.00  (S) | 1.00 (S) | <=0.12 (S) | <=4.00 (S) | >=32.00 (R) | >=8.00 (R) | SYN-S (S) |
| 2024/11/23 | N0819 | Blood | ICU | *E. avium* | \ | 2.00  (S) | \ | ≤2.00 (S) | \ | 1.00  (S) | ≤1.00 (S) | ≥8.00 (R) | ≤500.00 (S) |
| 2023/8/3 | N0359 | Pus | Surgery | *E. avium* | 32.00 (R) | 16.00 (R) | 2.00  (S) | 2.00 (S) | <=0.12 (S) | <=0.50 (S) | <=0.50 (S) | >=8.00 (R) | SYN-S (S) |
| 2024/6/15 | M8511 | Ascites | Surgery | *E. cecorum* | \ | \ | <=1.00 (S) | <=2.00 (S) | \ | <=1.00 (S) | <=8.00 (S) | <=0.25 (S) | <=500.00 (S) |
| 2024/7/12 | F9905 | Excreta | Orthopedics | *E. faecalis* | 8.00  (S) | <=2.00 (S) | 2.00 (S) | 2.00 (S) | <=0.12 (S) | 2.00  (S) | 1.00  (S) | >=8.00 (R) | SYN-S (S) |
| 2023/7/22 | F9715 | Urine | Surgery | *E. faecalis* | 4.00  (S) | <=2.00 (S) | 1.00 (S) | 2.00 (S) | <=0.12 (S) | 1.00  (S) | <=0.50 (S) | >=8.00 (R) | SYN-R (R) |
| 2024/7/7 | F9618 | Catheter tip | Surgery | *E. faecalis* | 4.00  (S) | <=2.00 (S) | >=8.00 (R) | 2.00 (S) | <=0.12 (S) | 1.00  (S) | <=0.50 (S) | >=8.00 (R) | SYN-R (R) |
| 2023/7/6 | F8825 | Urine | Oncology | *E. faecalis* | 4.00  (S) | <=2.00 (S) | >=8.00 (R) | 2.00 (S) | <=0.12 (S) | 1.00  (S) | <=0.50 (S) | >=8.00 (R) | SYN-R (R) |
| 2023/7/4 | F8777 | Urine | Internal medicine | *E. faecalis* | 2.00  (S) | <=2.00 (S) | >=8.00 (R) | 2.00 (S) | <=0.12 (S) | 1.00  (S) | <=0.50 (S) | >=8.00 (R) | SYN-R (R) |
| 2023/7/3 | F8664 | Urine | Geriatrics | *E. faecalis* | 2.00  (S) | <=2.00 (S) | 1.00 (S) | 2.00 (S) | <=0.12 (S) | 1.00  (S) | <=0.50 (S) | >=8.00 (R) | SYN-R (R) |
| 2023/3/6 | F8383 | Urine | Surgery | *E. faecalis* | 8.00  (S) | <=2.10 (S) | >=8.00 (R) | 2.00 (S) | <=0.13 (S) | 1.00 (S) | <=0.60 (S) | >=8.00 (R) | SYN-R (R) |
| 2023/6/11 | F7604 | Catheter tip | Internal medicine | *E. faecalis* | 4.00  (S) | <=2.00 (S) | >=8.00 (R) | 2.00 (S) | <=0.12 (S) | 1.00  (S) | <=0.50 (S) | >=8.00 (R) | SYN-R (R) |
| 2024/5/20 | F7195 | Urine | Surgery | *E. faecalis* | 8.00  (S) | <=2.00 (S) | >=8.00 (R) | 2.00 (S) | <=0.12 (S) | <=4.00 (S) | <=8.00 (S) | >=8.00 (R) | SYN-R (R) |
| 2023/9/22 | F7164 | Urine | Surgery | *E. faecalis* | 8.00  (S) | <=2.00 (S) | >=8.00 (R) | 2.00 (S) | <=0.12 (S) | 1.00  (S) | 1.00  (S) | 1.00 (I) | SYN-S (S) |
| 2023/5/31 | F7100 | Blood | ICU | *E. faecalis* | 4.00  (S) | <=2.00 (S) | 2.00 (S) | 4.00  (I) | <=0.12 (S) | 1.00  (S) | <=0.50 (S) | 2.00 (I) | SYN-S (S) |
| 2023/5/29 | F7055 | Urine | Oncology | *E. faecalis* | 4.00  (S) | <=2.00 (S) | 0.50  (S) | 2.00 (S) | <=0.12 (S) | 1.00  (S) | <=0.50 (S) | >=8.00 (R) | SYN-R (R) |
| 2024/5/7 | F6557 | Excreta | Orthopedics | *E. faecalis* | 4.00  (S) | <=2.00 (S) | >=8.00 (R) | 2.00 (S) | <=0.12 (S) | 1.00  (S) | <=0.50 (S) | >=8.00 (R) | SYN-R (R) |
| 2023/5/9 | F5988 | Urine | Surgery | *E. faecalis* | 32.00 (R) | 4.00  (R) | >=8.00 (R) | 2.00 (S) | <=0.12 (S) | 2.00  (S) | 1.00  (S) | >=8.00 (R) | SYN-S (S) |
| 2024/4/25 | F5973 | Urine | Internal medicine | *E. faecalis* | \ | <=0.50 (S) | \ | 4.00  (I) | <=0.03 (S) | 1.00  (S) | <=1.00 (S) | >8.00 (R) | >500.00 (R) |
| 2023/5/1 | F5567 | Excreta | Orthopedics | *E. faecalis* | 4.00  (S) | <=2.00 (S) | >=8.00 (R) | 4.00  (I) | <=0.12 (S) | 1.00  (S) | <=0.50 (S) | >=8.00 (R) | SYN-R (R) |
| 2023/11/21 | F5517 | Urine | Internal medicine | *E. faecalis* | 4.00  (S) | <=2.00 (S) | >=8.00 (R) | \ | <=0.12 (S) | 1.00  (S) | <=0.50 (S) | >=8.00 (R) | 513.00 (R) |
| 2023/11/20 | F5445 | Urine | Rehabilitation medicine | *E. faecalis* | 4.00  (S) | <=2.00 (S) | >=8.00 (R) | 1.00 (S) | <=0.12 (S) | 1.00  (S) | <=0.50 (S) | >=8.00 (R) | SYN-R (R) |
| 2024/4/16 | F5410 | Urine | Rehabilitation medicine | *E. faecalis* | 8.00  (S) | <=2.00 (S) | 1.00 (S) | 2.00 (S) | <=0.12 (S) | 1.00  (S) | 1.00  (S) | >=8.00 (R) | SYN-S (S) |
| 2023/4/26 | F5385 | Urine | Surgery | *E. faecalis* | 2.00  (S) | <=2.00 (S) | >=8.00 (R) | \ | <=0.12 (S) | 1.00 (S) | <=0.50 (S) | >=8.00 (R) | SYN-R (R) |
| 2023/11/8 | F4923 | Excreta | Orthopedics | *E. faecalis* | 2.00  (S) | <=2.00 (S) | 2.00 (S) | 1.00 (S) | <=0.12 (S) | 4.00  (S) | 1.00  (S) | 0.50  (S) | SYN-S (S) |
| 2023/4/15 | F4795 | Bile | Surgery | *E. faecalis* | 2.00  (S) | <=2.00 (S) | 2.00 (S) | 4.00  (I) | <=0.12 (S) | 1.00  (S) | <=0.50 (S) | >=8.00 (R) | SYN-R (R) |
| 2023/4/9 | F4505 | Excreta | Gynecology | *E. faecalis* | 8.00  (S) | <=2.00 (S) | >=8.00 (R) | 2.00 (S) | <=0.12 (S) | 1.00  (S) | 1.00  (S) | >=8.00 (R) | SYN-R (R) |
| 2023/6/20 | F4489 | Catheter tip | Surgery | *E. faecalis* | 8.00  (S) | <=2.00 (S) | >=8.00 (R) | \ | <=0.12 (S) | 1.00  (S) | 1.00  (S) | >=8.00 (R) | SYN-R (R) |
| 2024/7/7 | F4262 | Blood | Rehabilitation medicine | *E. faecalis* | 4.00  (S) | <=2.00 (S) | 1.00  (S) | 2.00 (S) | <=0.12 (S) | 1.00  (S) | 1.00  (S) | >=8.00 (R) | SYN-R (R) |
| 2024/3/20 | F4023 | Alveolar lavage fluid | ICU | *E. faecalis* | 4.00  (S) | <=2.00 (S) | 2.00 (S) | 2.00 (S) | <=0.12 (S) | 1.00  (S) | <=0.50 (S) | <=0.25 (S) | SYN-S (S) |
| 2024/7/31 | F3815 | Urine | Internal medicine | *E. faecalis* | 4.00  (S) | <=2.00 (S) | 1.00 (S) | 2.00 (S) | <=0.12 (S) | 1.00  (S) | <=0.50 (S) | 2.00 (I) | SYN-S (S) |
| 2023/10/18 | F3809 | Excreta | Pediatrics | *E. faecalis* | 4.00  (S) | <=2.00 (S) | 2.00 (S) | 2.00 (S) | <=0.12 (S) | 1.00  (S) | 1.00  (S) | >=8.00 (R) | 512.00 (S) |
| 2023/10/18 | F3808 | Excreta | Internal medicine | *E. faecalis* | 4.00  (S) | <=2.00 (S) | >=8.00 (R) | 2.00 (S) | <=0.12 (S) | 1.00  (S) | <=0.50 (S) | >=8.00 (R) | 513.00 (R) |
| 2023/10/15 | F3704 | Urine | Surgery | *E. faecalis* | 2.00  (S) | <=2.00 (S) | 4.00  (I) | 2.00 (S) | <=0.12 (S) | 1.00  (S) | <=0.50 (S) | >=8.00 (R) | SYN-S (S) |
| 2023/10/15 | F3695 | Bile | Internal medicine | *E. faecalis* | 8.00  (S) | <=2.00 (S) | 2.00 (S) | 4.00  (I) | <=0.12 (S) | 1.00  (S) | <=0.50 (S) | 1.00 (I) | SYN-S (S) |
| 2023/3/22 | F3659 | Urine | Geriatrics | *E. faecalis* | 4.00  (S) | <=2.00 (S) | 1.00 (S) | 2.00 (S) | <=0.12 (S) | 1.00  (S) | 1.00  (S) | 2.00 (I) | SYN-S (S) |
| 2023/3/20 | F3545 | Ascites | Surgery | *E. faecalis* | 8.00  (S) | <=2.00 (S) | >=8.00 (R) | 2.00 (S) | <=0.12 (S) | 1.00  (S) | <=0.50 (S) | >=8.00 (R) | SYN-R (R) |
| 2023/3/19 | F3506 | Bile | Internal medicine | *E. faecalis* | 4.00  (S) | <=2.00 (S) | 2.00 (S) | 2.00 (S) | <=0.12 (S) | 1.00  (S) | <=0.50 (S) | >=8.00 (R) | SYN-S (S) |
| 2024/9/28 | F3504 | Excreta | Gynecology | *E. faecalis* | 2.00  (S) | <=2.00 (S) | 2.00 (S) | 2.00 (S) | \ | 1.00  (S) | <=0.50 (S) | >=8.00 (R) | 500.00 (S) |
| 2024/9/27 | F3485 | Urine | Internal medicine | *E. faecalis* | 2.00  (S) | <=2.00 (S) | 1.00 (S) | 2.00 (S) | <=0.12 (S) | 1.00  (S) | <=0.50 (S) | <=0.25 (S) | 500.00 (S) |
| 2023/10/8 | F3345 | Excreta | Orthopedics | *E. faecalis* | 4.00  (S) | <=2.00 (S) | 2.00 (S) | 2.00 (S) | <=0.12 (S) | 1.00  (S) | 1.00  (S) | >=8.00 (R) | SYN-S (S) |
| 2024/9/24 | F3300 | Urine | Surgery | *E. faecalis* | 4.00  (S) | <=2.00 (S) | 1.00 (S) | 2.00 (S) | <=0.12 (S) | 1.00  (S) | <=0.50 (S) | 2.00 (I) | 500.00 (S) |
| 2024/9/24 | F3294 | Tissue | Orthopedics | *E. faecalis* | \ | \ | \ | <=2.00 (S) | <=0.12 (S) | <=1.00 (S) | <=8.00 (S) | >=8.00 (R) | <=500.00 (S) |
| 2024/9/24 | F3287 | Excreta | Surgery | *E. faecalis* | \ | \ | <=1.00 (S) | <=2.00 (S) | <=0.12 (S) | <=1.00 (S) | <=8.00 (S) | >=8.00 (R) | <=500.00 (S) |
| 2024/3/5 | F3087 | Excreta | Orthopedics | *E. faecalis* | 4.00  (S) | <=2.00 (S) | >=8.00 (R) | 2.00 (S) | <=0.12 (S) | 1.00  (S) | <=0.50 (S) | >=8.00 (R) | SYN-R (R) |
| 2024/9/19 | F3050 | Excreta | Obstetrical | *E. faecalis* | 8.00  (S) | <=2.00 (S) | >=8.00 (R) | \ | <=0.12 (S) | 1.00  (S) | 1.00  (S) | >=8.00 (R) | SYN-R (R) |
| 2024/3/4 | F3025 | Urine | Surgery | *E. faecalis* | \ | 27.00 (S) | 4.00 (I) | 2.00 (S) | <=0.12 (S) | \ | \ | 0.50 (S) | \ |
| 2023/2/11 | F2956 | Urine | Surgery | *E. faecalis* | 4.00  (S) | <=2.00 (S) | >=8.00 (R) | \ | <=0.12 (S) | 1.00 (S) | <=0.50 (S) | >=8.00 (R) | SYN-R (R) |
| 2024/3/2 | F2943 | Ascites | Oncology | *E. faecalis* | 4.00  (S) | <=2.00 (S) | 2.00 (S) | 2.00 (S) | <=0.12 (S) | 1.00  (S) | <=0.50 (S) | 2.00 (I) | SYN-S (S) |
| 2023/9/22 | F2753 | Urine | Surgery | *E. faecalis* | 8.00  (S) | <=2.00 (S) | 2.00 (S) | 2.00 (S) | <=0.12 (S) | 1.00  (S) | <=0.50 (S) | 2.00 (I) | SYN-S (S) |
| 2024/2/27 | F2734 | Urine | Surgery | *E. faecalis* | 1.00  (S) | <=2.00 (S) | 1.00 (S) | 2.00 (S) | <=0.12 (S) | <=0.50 (S) | <=0.50 (S) | 4.00 (I) | SYN-S (S) |
| 2024/2/27 | F2707 | Bile | Surgery | *E. faecalis* | >=64.00 (R) | >=2.00 (R) | 0.25 (S) | \ | 0.25 (S) | 1.50  (S) | 8.00  (S) | >=8.00 (R) | SYN-S (S) |
| 2024/9/9 | F2658 | Urine | Surgery | *E. faecalis* | 2.00  (S) | <=2.00 (S) | >=8.00 (R) | 2.00 (S) | <=0.12 (S) | 1.00  (S) | <=0.50 (S) | >=8.00 (R) | SYN-S (S) |
| 2024/2/26 | F2638 | Excreta | Orthopedics | *E. faecalis* | 4.00  (S) | <=2.00 (S) | 1.00 (S) | 2.00 (S) | <=0.12 (S) | 1.00  (S) | <=0.50 (S) | >=8.00 (R) | SYN-R (R) |
| 2024/9/8 | F2586 | Excreta | Internal medicine | *E. faecalis* | 8.00  (S) | <=2.00 (S) | >=8.00 (R) | 2.00 (S) | <=0.12 (S) | 1.00  (S) | <=0.50 (S) | >=8.00 (R) | SYN-R (R) |
| 2024/2/22 | F2483 | Urine | Surgery | *E. faecalis* | 8.00  (S) | <=2.00 (S) | >=8.00 (R) | 2.00 (S) | <=0.12 (S) | 1.00  (S) | <=0.50 (S) | >=8.00 (R) | SYN-R (R) |
| 2024/8/29 | F2165 | Urine | Surgery | *E. faecalis* | 4.00  (S) | <=2.00 (S) | 1.00 (S) | 2.00 (S) | <=0.12 (S) | 1.00  (S) | <=0.50 (S) | <=0.25 (S) | SYN-S (S) |
| 2024/3/13 | F2106 | Excreta | Orthopedics | *E. faecalis* | 8.00  (S) | <=2.00 (S) | 1.00 (S) | 2.00 (S) | <=0.12 (S) | 1.00  (S) | <=0.50 (S) | >=8.00 (R) | SYN-S (S) |
| 2024/2/9 | F1945 | Blood | Rehabilitation medicine | *E. faecalis* | 4.00  (S) | <=2.00 (S) | 1.00 (S) | 2.00 (S) | <=0.12 (S) | 1.00  (S) | <=0.50 (S) | <=0.25 (S) | SYN-S (S) |
| 2024/2/1 | F1637 | Bile | Surgery | *E. faecalis* | 1.00  (S) | <=2.00 (S) | >=8.00 (R) | \ | <=0.12 (S) | 1.00  (S) | <=0.50 (S) | >=8.00 (R) | SYN-R (R) |
| 2023/7/8 | F1175 | Excreta | Orthopedics | *E. faecalis* | \ | 21.00 (S) | 6.00 (R) | 26.00 (S) | \ | 17.00 (S) | \ | \ | 23.00 (S) |
| 2023/9/28 | F1097 | Urine | Gynecology | *E. faecalis* | \ | 20.00 (S) | 6.00 (R) | 23.00 (S) | \ | 17.00 (S) | \ | \ | 15.00 (S) |
| 2024/1/20 | F1006 | Urine | Surgery | *E. faecalis* | 2.00  (S) | <=2.00 (S) | >=8.00 (R) | 2.00 (S) | <=0.12 (S) | 1.00  (S) | <=0.50 (S) | >=8.00 (R) | SYN-R (R) |
| 2023/8/14 | F0935 | Excreta | Surgery | *E. faecalis* | 4.00  (S) | <=2.00 (S) | >=8.00 (R) | 2.00 (S) | <=0.12 (S) | 1.00  (S) | <=0.50 (S) | >=8.00 (R) | SYN-R (R) |
| 2024/8/1 | F0869 | Urine | Internal medicine | *E. faecalis* | 2.00  (S) | <=2.00 (S) | 1.00 (S) | 2.00 (S) | <=0.12 (S) | 2.00  (S) | <=0.50 (S) | >=8.00 (R) | SYN-S (S) |
| 2023/2/18 | F0822 | Urine | Orthopedics | *E. faecium* | 4.00  (S) | <=2.00 (S) | 1.00 (S) | 2.00 (S) | <=0.12 (S) | 1.00  (S) | <=0.50 (S) | >=8.00 (R) | SYN-S (S) |
| 2024/11/22 | F0776 | Pus | Surgery | *E. faecalis* | \ | 2.00 (S) | ≥8.00 (R) | ≤2.00 (S) | \ | 2.00  (S) | ≤1.00 (S) | \ | ≥1000.00 (R) |
| 2023/8/17 | F0560 | Urine | Internal medicine | *E. faecalis* | \ | 19.00 (S) | 6.00 (R) | 23.00 (S) | \ | 17.00 (S) | \ | \ | 11.00 (S) |
| 2023/8/10 | F0339 | Urine | Surgery | *E. faecalis* | \ | 18.00 (S) | 22.00 (S) | 24.00 (S) | \ | 17.00 (S) | \ | \ | 10.00 (S) |
| 2024/7/21 | F0317 | Urine | Surgery | *E. faecalis* | 1.00  (S) | 8.00  (S) | 2.00 (S) | 2.00 (S) | <=0.12 (S) | <=0.50 (S) | <=0.50 (S) | >=8.00 (R) | SYN-R (R) |
| 2023/10/11 | F0294 | Excreta | Orthopedics | *E. faecalis* | \ | 21.00 (S) | 6.00 (R) | 27.00 (S) | \ | 17.00 (S) | \ | \ | 10.00  (S) |
| 2024/7/20 | F0269 | Urine | Surgery | *E. faecalis* | 4.00  (S) | <=2.00 (S) | 0.50 (S) | 2.00 (S) | <=0.12 (S) | 2.00  (S) | <=0.50 (S) | 2.00 (I) | SYN-S (S) |
| 2024/7/19 | F0243 | Urine | Rehabilitation medicine | *E. faecalis* | 2.00  (S) | <=2.00 (S) | >=8.00 (R) | 2.00 (S) | <=0.12 (S) | 1.00  (S) | <=0.50 (S) | >=8.00 (R) | SYN-R (R) |
| 2023/8/8 | F0240 | Ascites | Gynecology | *E. faecalis* | \ | 20.00 (S) | 6.00 (R) | 23.00 (S) | \ | 17.00 (S) | \ | \ | 6.00  (R) |
| 2024/7/17 | F0106 | Urine | Surgery | *E. faecalis* | 2.00  (S) | <=2.00 (S) | 2.00 (S) | 2.00 (S) | <=0.12 (S) | 1.00  (S) | <=0.50 (S) | 2.00 (I) | SYN-S (S) |
| 2024/5/16 | C7054 | Excreta | Orthopedics | *E. gallinarum* | 1.00  (S) | <=2.00 (S) | 2.00 (S) | 2.00 (S) | <=0.12 (S) | 4.00  (R) | <=0.50 (S) | <=0.25 (S) | SYN-S (S) |

1. **= Susceptible** (R) = **Resistant** (I) = **Intermediate**

**Supplementary Table S2.** List of genomic information of 59 sequenced samples.

| **Sample number** | **Genome size(bp)** | **Maximum contig**  **Length（bp）** | **N50 （bp）** | **GC content （%）** | **Predicted genes** | **Gene average**  **Length** | **rRNA operons** | **tRNAs** | **Accession Number** |
| --- | --- | --- | --- | --- | --- | --- | --- | --- | --- |
| C7054 | 3 544 432 | 358 332 | 159 975 | 40.29 | 3 456 | 292 | 3 | 55 | SRR31829618 |
| F0822 | 3 221 493 | 476 524 | 398 484 | 37.01 | 3 198 | 297 | 8 | 59 | SRR31829611 |
| F2106 | 2 993 344 | 544 249 | 339 201 | 37.29 | 2 931 | 303 | 5 | 55 | SRR31829589 |
| F2753 | 3 063 067 | 499 303 | 195 959 | 37.15 | 2 971 | 902 | 3 | 60 | SRR31829603 |
| F2956 | 2 930 375 | 605 299 | 544 952 | 37.16 | 2 719 | 945 | 3 | 54 | SRR31829577 |
| F3506 | 3 045 619 | 622 265 | 495 400 | 37.21 | 2 900 | 308 | 8 | 55 | SRR31829601 |
| F3659 | 2 747 476 | 1 474 158 | 1 474 158 | 37.56 | 2 537 | 959 | 3 | 52 | SRR31829559 |
| F4023 | 2 735 678 | 1 485 635 | 1 485 635 | 37.7 | 2 601 | 312 | 5 | 52 | SRR31829558 |
| F4489 | 3 035 879 | 467 509 | 198 602 | 37.14 | 2 842 | 925 | 4 | 54 | SRR31829598 |
| F4795 | 3 020 250 | 545 628 | 544 701 | 37.24 | 2 837 | 927 | 3 | 56 | SRR31829593 |
| F5445 | 3 134 694 | 778 246 | 535 141 | 37.02 | 3 006 | 912 | 3 | 58 | SRR31829608 |
| F5517 | 2 923 044 | 729 530 | 513 495 | 37.32 | 2 749 | 932 | 5 | 57 | SRR31829575 |
| F5567 | 2 981 567 | 869 808 | 203 015 | 37.24 | 2 821 | 924 | 3 | 57 | SRR31829586 |
| F5973 | 3 144 477 | 616 554 | 328 231 | 37.06 | 3 055 | 293 | 5 | 58 | SRR31829609 |
| F7055 | 3 016 522 | 719 742 | 254 313 | 37.36 | 2 832 | 926 | 3 | 53 | SRR31829592 |
| F7100 | 2 945 615 | 1 410 369 | 238 540 | 37.26 | 2 771 | 931 | 3 | 54 | SRR31829579 |
| F7164 | 3 039 001 | 524 107 | 178 990 | 37.29 | 2 927 | 912 | 3 | 56 | SRR31829600 |
| F7195 | 2 875 034 | 971 919 | 544 822 | 37.53 | 2 812 | 299 | 5 | 56 | SRR31829569 |
| F7604 | 2 928 172 | 887 332 | 235 679 | 37.27 | 2 770 | 924 | 5 | 58 | SRR31829576 |
| F8383 | 3 186 448 | 316 348 | 146 449 | 37.24 | 3 082 | 901 | 3 | 55 | SRR31829610 |
| F8777 | 3 115 573 | 774 837 | 234 233 | 37.18 | 3 123 | 880 | 10 | 75 | SRR31829607 |
| F9905 | 3 000 295 | 511 618 | 555 504 | 37.12 | 2 909 | 307 | 5 | 55 | SRR31829591 |
| F9715 | 3 024 220 | 855 640 | 371 810 | 37.64 | 3229 | 844 | 9 | 78 | SRR31829594 |
| M8511 | 2 432 181 | 227 387 | 120 831 | 36.58 | 2 522 | 282 | 3 | 60 | SRR31829557 |
| N0359 | 4 373 144 | 251 708 | 69 305 | 38.94 | 4 286 | 881 | 5 | 64 | SRR31829623 |
| N1486 | 4 516 929 | 237 481 | 82 431 | 39.01 | 4 516 | 286 | 5 | 64 | SRR31829624 |
| N3144 | 4 551 919 | 204 227 | 67 979 | 38.94 | 4 469 | 807 | 6 | 63 | SRR31829625 |
| N4394 | 4 349 865 | 251 029 | 84 471 | 39.03 | 4 253 | 882 | 5 | 67 | SRR31829622 |
| Q4638 | 3 433 199 | 339 077 | 129 343 | 42.55 | 3 275 | 922 | 5 | 59 | SRR31829615 |
| Q5431 | 3 748 786 | 739 209 | 509 044 | 42.36 | 3 594 | 306 | 3 | 56 | SRR31829620 |
| Q6940 | 3 694 009 | 724 236 | 225 696 | 42.35 | 3 487 | 299 | 3 | 54 | SRR31829619 |
| S0101 | 2 919 612 | 130 015 | 47 627 | 37.7 | 2 794 | 884 | 6 | 65 | SRR31829574 |
| S0266 | 2 837 180 | 146 698 | 31 308 | 37.8 | 2 797 | 284 | 4 | 61 | SRR31829566 |
| S0599 | 2 896 199 | 123 058 | 43 175 | 37.76 | 2 833 | 282 | 4 | 65 | SRR31829571 |
| S2638 | 2 959 556 | 129 489 | 34 926 | 37.56 | 2 880 | 867 | 8 | 75 | SRR31829581 |
| S2863 | 2 778 195 | 468 660 | 218 379 | 38.3 | 2 662 | 302 | 6 | 56 | SRR31829561 |
| S2970 | 2 970 018 | 190 877 | 43 855 | 37.59 | 2 828 | 880 | 6 | 65 | SRR31829582 |
| S3218 | 2 881 280 | 141 786 | 33 245 | 37.74 | 2 786 | 873 | 6 | 66 | SRR31829570 |
| S3419 | 2 978 308 | 165 726 | 42 480 | 37.59 | 2 935 | 284 | 4 | 64 | SRR31829585 |
| S3875 | 2 941 307 | 155 119 | 38 415 | 37.6 | 2 948 | 278 | 4 | 65 | SRR31829578 |
| S4734 | 3 027 339 | 228 190 | 38 740 | 37.56 | 2 952 | 864 | 5 | 69 | SRR31829596 |
| S5022 | 3 038 683 | 229 665 | 33 075 | 37.59 | 2 959 | 863 | 7 | 74 | SRR31829599 |
| S5219 | 2 994 333 | 122 075 | 37 104 | 37.63 | 2 875 | 878 | 8 | 69 | SRR31829590 |
| S5290 | 2 862 623 | 137 217 | 47 818 | 37.71 | 2 768 | 878 | 5 | 69 | SRR31829567 |
| S5617 | 2 793 265 | 158 306 | 47 394 | 37.84 | 2 664 | 886 | 5 | 67 | SRR31829564 |
| S5857 | 2 757 966 | 164 119 | 74 533 | 38.16 | 2 668 | 883 | 6 | 65 | SRR31829560 |
| S6449 | 2 903 035 | 130 015 | 47 627 | 37.73 | 2 768 | 887 | 5 | 66 | SRR31829572 |
| S6573 | 3 028 248 | 228 190 | 38 740 | 37.56 | 2 924 | 869 | 5 | 68 | SRR31829597 |
| S6585 | 2 970 288 | 148 807 | 35 189 | 37.62 | 2 819 | 880 | 4 | 65 | SRR31829583 |
| S6605 | 2 957 453 | 123 235 | 43 502 | 37.62 | 2 827 | 879 | 6 | 65 | SRR31829580 |
| S6995 | 2 869 494 | 144 637 | 33 245 | 37.73 | 2 745 | 881 | 7 | 66 | SRR31829568 |
| S7033 | 2 792 182 | 158 306 | 45 837 | 37.84 | 2 662 | 886 | 7 | 67 | SRR31829563 |
| S7392 | 2 798 263 | 135 984 | 47 955 | 37.79 | 2 719 | 291 | 4 | 61 | SRR31829565 |
| S7603 | 2 989 428 | 123 445 | 34 609 | 37.83 | 3 245 | 798 | 9 | 80 | SRR31829587 |
| S7637 | 3 064 018 | 162 953 | 39 242 | 37.48 | 2 931 | 874 | 5 | 69 | SRR31829604 |
| S8251 | 3 112 514 | 132 330 | 29 284 | 37.72 | 3 164 | 838 | 9 | 79 | SRR31829605 |
| S8294 | 3 300 762 | 179 369 | 29 159 | 37.45 | 3 184 | 850 | 7 | 72 | SRR31829612 |
| S8730 | 3 051 091 | 109 685 | 37 614 | 37.56 | 2 964 | 861 | 7 | 73 | SRR31829602 |
| S8813 | 2 991 772 | 155 611 | 47 628 | 37.54 | 2 941 | 857 | 7 | 70 | SRR31829588 |

**Supplementary Table S3.** Genomic summary of the sequenced clinical isolates

| **Species (n)** | **Genome**  **Size (Mbp)** | **GC content**  **(%)** | **Predicted genes** | **rRNA**  **operons** | **tRNAs** |
| --- | --- | --- | --- | --- | --- |
| E. Faecium (28) | 2.95±0.12 | 37.70±0.19 | 2 865.79±152.21 | 5.93±1.13 | 67.71±5.21 |
| E. Faecalis (22) | 3.00±0.12 | 37.27±0.18 | 2 891.91±176.84 | 4.73±2.16 | 57.59±6.49 |
| E. Avium (4) | 4.45±0.10 | 38.98±0.05 | 4 381.00±130.87 | 5.25±0.50 | 64.50±1.73 |
| E. Casseliflavus (3) | 3.63±0.17 | 42.42±0.11 | 3 452.00±162.36 | 3.67±1.15 | 56.33±2.52 |
| E. Gallinarum (1) | 3.54 | 40.29 | 3 456.00 | 3.00 | 55.00 |
| E. Cecorum (1) | 2 43 | 36.58 | 2 522.00 | 3.00 | 6.00 |

The genomes of E. faecium and E. faecalis are similar in size (approximately 3 Mbp) and GC content (around 37%). In contrast, E. avium exhibited a markedly larger genome (about 4.45 Mbp). E. casseliflavus and E. gallinarum displayed higher GC contents (>40%), whereas the single E. cecorum genome was the smallest (2.43 Mbp) and contained the fewest rRNAs and tRNAs. Comparative analysis based on the NCBI databas (see Supplementary Table S3) confirmed that the genomic features of antibiotic-resistant Enterococcus isolates from the Yichang region were consistent with those reported for each species in global datasets.

**Supplementary Table S4.** Alignment of the seven housekeeping genes in the three E. faecalis isolates

| **Strain** | **aroE** | **gdh** | **gki** | **gyd** | **pstS** | **xpt** | **yqiL** | **Result** |
| --- | --- | --- | --- | --- | --- | --- | --- | --- |
| F0822 | 7 | 5 | 3 | error | 1 | 1 | 6 | bad |
| F3659 | 3 | 12 | 17 | 6 | － | 2 | 5 | new |
| F4023 | － | 1 | 15 | 7 | 9 | 1 | 1 | new |
